# Supplementary material
Source: PubMed Central journal article supplement (PMC4524158)
Supplement: AEM.00741-15_zam999116332so1.pdf [file AEM.00741-15_zam999116332so1.pdf]

Table S1. Strains of soybean bradyrhizobia used in this study

| Strain   | Relevant characteristics                                       | Source or reference |
|----------|----------------------------------------------------------------|---------------------|
| USDA110  | Non-HRS strain                                                 | USDA <sup>a</sup>   |
| NK5      | HRS field isolate from Nagakura, Niigata, Japan                | 1                   |
| NK6      | HRS field isolate from Nagakura, Niigata, Japan                | 1                   |
| USDA123  | HRS field isolate from USA                                     | 2                   |
| T2       | HRS field isolate from Tokachi, Hokkaido, Japan                | 3                   |
| USDA135  | HRS field isolate from USA                                     | 2                   |
| 2281     | HRS field isolate from Heilongjiang Province, China (USDA3622) | 4                   |
| NC6      | Non-HRS strain                                                 | 1                   |
| Kas1-4   | Non-HRS strain                                                 | 6                   |
| Kas2-2   | Non-HRS strain                                                 | 6                   |
| Tsu4-125 | Non-HRS strain                                                 | 6                   |
| Yam3-2   | Non-HRS strain                                                 | 6                   |
| Hok1-31  | Non-HRS strain                                                 | 6                   |
| Kag1-5   | Non-HRS strain                                                 | 6                   |
| Fuk1-11  | Non-HRS strain                                                 | 6                   |
| USDA122  | Non-HRS strain                                                 | 6                   |
| NC4      | Non-HRS strain                                                 | 6                   |
| NK2      | Non-HRS strain                                                 | 6                   |
| Kas1-7   | Non-HRS strain                                                 | 6                   |
| Yam3-7   | Non-HRS strain                                                 | 6                   |
| Hok10-2  | Non-HRS strain                                                 | 6                   |
| Fuk1-6   | Non-HRS strain                                                 | 6                   |
| Kag1-3   | Non-HRS strain                                                 | 6                   |
| S23321   | Non-symbiotic strain that does not nodulate soybean plants     | 7                   |

<sup>a</sup> USDA, U.S. Department of Agriculture, Beltsville, MD.

Table S2. Genome size of HRS strains of soybean bradyrhizobia estimated by pulsed-field gel electrophoresis<sup>a</sup>

| Strain  | RE           | Fragment size (kb)                                                       | Total fragment size (Mb) |
|---------|--------------|--------------------------------------------------------------------------|--------------------------|
| Non-HRS |              |                                                                          |                          |
| USDA110 | <i>Smi</i> I | 2600, 2000, 1500, 1200, 1100, 330, 150, 120, 110                         | 9.1                      |
| HRS     |              |                                                                          |                          |
| NK5     | <i>Smi</i> I | 4500, 2100, 1100, 880, 440, 400, 380, 130                                | 9.9                      |
|         | <i>Pme</i> I | 5000, 2000, 1000, 900, 500                                               | 9.4                      |
| NK6     | <i>Smi</i> I | 3500, 2100, 1800, 1200, 450, 430                                         | 9.5                      |
|         | <i>Pme</i> I | 5000, 2500, 1400, 1100                                                   | 10.0                     |
| USDA135 | <i>Smi</i> I | 4600, 3300, 1400, 740, 640                                               | 10.7                     |
| 2281    | <i>Smi</i> I | 4600, 3300, 1300, 950                                                    | 10.2                     |
| USDA123 | <i>Smi</i> I | 4200, 1600, 1100, 650, 580, 500, 400, 380, 340, 270, 240, 200, 160       | 10.6                     |
|         | <i>Pme</i> I | 4200, 3100, 2000, 1400                                                   | 10.7                     |
| T2      | <i>Smi</i> I | 2700, 1700, 1100, 1050, 950, 620, 490, 440, 390, 260, 240, 170, 140, 120 | 10.4                     |
|         | <i>Pme</i> I | 4900, 2300, 1600, 1200                                                   | 10.0                     |

<sup>a</sup> USDA110 was used as a control strain. RE: Restriction enzyme. The averages of total sizes of chromosome fragments were 9.65 Mb (NK5), 9.75 Mb (NK6), 10.65 Mb (USDA123), and 10.20 Mb (T2).

Table S3. Parameters of genome sequences of HRS strains and coverage statistics of their mapping to the USDA110 genome<sup>a</sup>

| Strain   | HRS or non-HRS strains | Average length (bp) | Total reads | GC content (%) | Mapped reads (%) | Not mapped reads (%) | Average coverage | Maximum coverage |
|----------|------------------------|---------------------|-------------|----------------|------------------|----------------------|------------------|------------------|
| NK5      | HRS group A            | 225                 | 2,170,102   | 62.3           | 80               | 20                   | 42               | 13,947           |
| NK6      | HRS group A            | 218                 | 2,496,052   | 63.4           | 81               | 19                   | 47               | 10,097           |
| USDA135  | HRS group B            | 214                 | 1,752,256   | 62.6           | 63               | 37                   | 25               | 10,197           |
| 2281     | HRS group B            | 220                 | 2,436,194   | 62.1           | 63               | 37                   | 35               | 16,642           |
| T2       | HRS group C            | 229                 | 1,553,580   | 63.4           | 58               | 42                   | 21               | 3,375            |
| USDA123  | HRS group C            | 218                 | 2,030,892   | 63.4           | 58               | 42                   | 27               | 4,659            |
| USDA110  | non-HRS                | 221                 | 1,545,842   | 63.8           | 99               | 1                    | 37               | 98               |
| NC6      | non-HRS                | 226                 | 2,173,812   | 63.3           | 90               | 11                   | 48               | 497              |
| Kas1-4   | non-HRS                | 232                 | 1,611,664   | 61.8           | 98               | 2                    | 38               | 99               |
| Kas2-2   | non-HRS                | 233                 | 1,404,884   | 62.4           | 93               | 7                    | 32               | 253              |
| Tsu4-125 | non-HRS                | 223                 | 1,816,360   | 62.2           | 93               | 7                    | 40               | 381              |
| Yam3-2   | non-HRS                | 210                 | 1,349,040   | 62.6           | 95               | 5                    | 28               | 140              |
| Hok1-31  | non-HRS                | 224                 | 2,174,490   | 61.9           | 95               | 5                    | 49               | 385              |
| Kag1-5   | non-HRS                | 216                 | 2,963,944   | 61.4           | 92               | 8                    | 62               | 626              |
| Fuk1-11  | non-HRS                | 217                 | 2,473,576   | 62.0           | 92               | 8                    | 52               | 570              |
| USDA122  | non-HRS                | 227                 | 2,192,500   | 62.2           | 92               | 8                    | 48               | 652              |
| NC4      | non-HRS                | 212                 | 3,391,300   | 61.6           | 91               | 9                    | 69               | 676              |
| NK2      | non-HRS                | 229                 | 2,347,168   | 61.9           | 92               | 8                    | 52               | 523              |
| Kas1-7   | non-HRS                | 228                 | 2,368,846   | 61.9           | 91               | 9                    | 52               | 565              |
| Yam3-7   | non-HRS                | 231                 | 2,225,346   | 61.9           | 92               | 8                    | 50               | 483              |
| Hok10-2  | non-HRS                | 230                 | 1,462,946   | 62.4           | 91               | 9                    | 32               | 332              |
| Fuk1-6   | non-HRS                | 224                 | 1,958,166   | 62.4           | 93               | 8                    | 43               | 477              |
| Kag1-3   | non-HRS                | 228                 | 960,644     | 63.1           | 92               | 8                    | 21               | 200              |

<sup>a</sup>The MiSeq reads of the non-HRS strain USDA110 were also mapped to the genomes of USDA110 (5) and those of the six HRS strains.

Table S4. Copy numbers of insertion sequences (ISs) in non-HRS strains by genome mapping

| IS                 |          |                       | Non-HRS strain |     |        |        |          |        |         |        |         |     |     |        |        |         |        |        |         | Standard deviation |         |
|--------------------|----------|-----------------------|----------------|-----|--------|--------|----------|--------|---------|--------|---------|-----|-----|--------|--------|---------|--------|--------|---------|--------------------|---------|
| Name in this study | ISFinder | Synonyms <sup>a</sup> | USDA110        | NC6 | Kas1-4 | Kas2-2 | Tsu4-125 | Yam3-2 | Hok1-31 | Kag1-5 | USDA122 | NC4 | NK2 | Kas1-7 | Yam3-7 | Hok10-2 | Fuk1-6 | Kag1-3 | Fuk1-11 |                    | Average |
| ISRj1              | ISRj1    | RS $\alpha$           | 18             | 15  | 18     | 14     | 12       | 19     | 12      | 14     | 11      | 11  | 10  | 11     | 12     | 11      | 10     | 10     | 12      | 12.9               | 2.9     |
| ISRj2              | ISRj2    | RS $\beta$            | 18             | 16  | 13     | 16     | 15       | 23     | 13      | 14     | 15      | 17  | 15  | 15     | 15     | 13      | 14     | 16     | 18      | 15.6               | 2.4     |
| ISFK1              | ISFK1    | FK1                   | 8              | 7   | 7      | 7      | 5        | 7      | 6       | 6      | 6       | 6   | 6   | 6      | 6      | 7       | 6      | 6      | 7       | 6.4                | 0.7     |
| IS1632             | IS1632   | IS1632                | 3              | 2   | 2      | 4      | 4        | 3      | 4       | 11     | 2       | 2   | 3   | 2      | 2      | 2       | 4      | 2      | 3       | 3.2                | 2.2     |
| ISBj6_B            | ISBj6_B  | ISB20                 | 3              | 3   | 3      | 6      | 12       | 3      | 10      | 8      | 4       | 4   | 3   | 4      | 4      | 3       | 3      | 4      | 4       | 4.8                | 2.7     |
| ISB27              |          | ISB27                 | 4              | 4   | 3      | 3      | 2        | 4      | 3       | 4      | 3       | 3   | 3   | 3      | 4      | 3       | 3      | 3      | 3       | 3.2                | 0.6     |
| ISBj2              | ISBj2    | ISBj2                 | 12             | 12  | 11     | 23     | 25       | 17     | 17      | 20     | 14      | 15  | 14  | 16     | 15     | 14      | 14     | 14     | 14      | 15.7               | 3.8     |
| ISBj3              | ISBj3    | ISBj3                 | 5              | 5   | 4      | 0      | 1        | 2      | 0       | 2      | 2       | 2   | 2   | 2      | 2      | 2       | 2      | 2      | 2       | 2.2                | 1.4     |
| ISBj4              | ISBj4    | ISBj4                 | 7              | 7   | 6      | 6      | 5        | 5      | 5       | 7      | 4       | 3   | 3   | 4      | 4      | 5       | 3      | 3      | 4       | 4.8                | 1.4     |
| ISBj5              | ISBj5    | ISBj5                 | 6              | 5   | 5      | 5      | 5        | 8      | 5       | 8      | 4       | 5   | 6   | 5      | 5      | 4       | 5      | 5      | 4       | 5.3                | 1.2     |
| ISBj6              |          | ISBj6                 | 1              | 1   | 1      | 1      | 1        | 0      | 1       | 1      | 0       | 0   | 0   | 0      | 0      | 0       | 0      | 0      | 0       | 0.4                | 0.5     |
| ISBj7              | ISBj7    | ISBj7                 | 13             | 13  | 12     | 16     | 14       | 15     | 15      | 18     | 12      | 14  | 13  | 13     | 14     | 12      | 13     | 10     | 14      | 13.6               | 1.8     |
| ISBj8              | ISBdi2   | ISBj8                 | 4              | 5   | 4      | 7      | 6        | 4      | 5       | 5      | 15      | 5   | 9   | 7      | 6      | 5       | 5      | 6      | 5       | 6.1                | 2.6     |
| ISBj9              | ISBj9    | ISBj9                 | 2              | 2   | 2      | 4      | 3        | 2      | 3       | 3      | 0       | 0   | 0   | 0      | 0      | 0       | 0      | 0      | 0       | 1.2                | 1.4     |
| ISBj10             |          | ISBj10                | 1              | 1   | 1      | 1      | 1        | 1      | 1       | 1      | 1       | 1   | 1   | 1      | 1      | 1       | 1      | 1      | 1       | 1                  | 0       |
| ISBj11             | ISBj11   | ISBj11                | 7              | 6   | 5      | 0      | 0        | 11     | 0       | 0      | 2       | 2   | 2   | 2      | 2      | 2       | 2      | 2      | 2       | 2.8                | 2.9     |
| ISBj12             | ISBj12   | ISBj12                | 1              | 1   | 1      | 2      | 1        | 0      | 1       | 4      | 3       | 4   | 3   | 3      | 3      | 3       | 3      | 3      | 3       | 2.3                | 1.2     |
| ISBj7_B            | ISBj7_B  | ISBj13                | 3              | 3   | 3      | 0      | 0        | 4      | 0       | 0      | 0       | 0   | 0   | 0      | 0      | 0       | 0      | 0      | 0       | 0.8                | 1.4     |
| ISBj5_B            | ISBj5_B  | ISBj14                | 8              | 5   | 7      | 2      | 4        | 4      | 5       | 4      | 2       | 2   | 2   | 3      | 2      | 2       | 2      | 4      | 3       | 3.6                | 1.8     |
| ISBj2_B            | ISBj2_B  | ISBj15                | 3              | 3   | 3      | 3      | 3        | 3      | 3       | 10     | 2       | 3   | 3   | 3      | 3      | 3       | 3      | 3      | 3       | 3.4                | 1.7     |
| IS1631             | IS1631   |                       | 0              | 0   | 0      | 0      | 0        | 0      | 0       | 0      | 0       | 0   | 0   | 0      | 0      | 0       | 0      | 0      | 0       | 0                  | 0       |
| Total              |          |                       | 126            | 115 | 111    | 120    | 119      | 135    | 109     | 140    | 102     | 99  | 98  | 100    | 100    | 92      | 93     | 94     | 102     | 109.1              | 14.7    |

<sup>a</sup> Copy numbers of ISs were estimated by BWA mapping to USDA110 (see text). ISFinder indicates approved IS name in the ISFinder database (<https://www-is.biotoul.fr>).

<sup>b</sup> Synonyms used in genome paper of *B. diazoefficiens* USDA110 (5).

Table S5. Replication initiator and partitioning genes

| BLASTP results |                |              |           |             |             |            |           |                |                                            |                                               |               |
|----------------|----------------|--------------|-----------|-------------|-------------|------------|-----------|----------------|--------------------------------------------|-----------------------------------------------|---------------|
| Replicon       | Start location | End location | Direction | Length (aa) | Gene        | Similarity | E-Value   | Subject length | Gene                                       | Bacteria                                      | Accession no. |
| chromosome     | 703219         | 703881       | -1        | 220         | <i>parA</i> | 100        | 4.55E-139 | 220            | chromosome partitioning protein ParA       | <i>Bradyrhizobium diazoefficiens</i> USDA 110 | WP_011088682  |
| chromosome     | 2218858        | 2219526      | 1         | 222         | <i>parA</i> | 100        | 4.69E-156 | 222            | chromosome partitioning protein ParA       | <i>Bradyrhizobium japonicum</i>               | WP_028182039  |
| chromosome     | 3560215        | 3561627      | 1         | 470         | <i>dnaA</i> | 100        | 0         | 470            | chromosomal replication initiation protein | <i>Bradyrhizobium diazoefficiens</i>          | WP_011083652  |
| chromosome     | 3637588        | 3638331      | 1         | 247         | <i>parA</i> | 99         | 2.46E-150 | 247            | chromosome partitioning protein ParA       | <i>Bradyrhizobium diazoefficiens</i> USDA 110 | WP_011083586  |
| chromosome     | 3773140        | 3773994      | 1         | 284         | <i>parA</i> | 100        | 0         | 284            | chromosome partitioning protein ParA       | <i>Bradyrhizobium diazoefficiens</i> USDA 110 | WP_011083458  |
| chromosome     | 3774132        | 3775019      | 1         | 295         | <i>parB</i> | 99         | 0         | 302            | chromosome partitioning protein ParB       | <i>Bradyrhizobium diazoefficiens</i> USDA 110 | WP_011083457  |
| chromosome     | 5279373        | 5280461      | 1         | 362         | <i>repA</i> | 96         | 0         | 365            | replication protein A                      | <i>Bradyrhizobium elkantii</i>                | WP_028343842  |
| chromosome     | 5618807        | 5619931      | 1         | 374         | <i>repA</i> | 89         | 0         | 425            | replication protein A                      | <i>Bradyrhizobium diazoefficiens</i> USDA 110 | WP_011082883  |
| pNK6a          | 72066          | 73331        | -1        | 421         | <i>repC</i> | 95         | 0         | 439            | replication initiation protein RepC        | <i>Bradyrhizobium japonicum</i>               | WP_028153003  |
| pNK6a          | 73555          | 74574        | -1        | 339         | <i>repB</i> | 76         | 1.47E-133 | 330            | chromosome partitioning protein ParB       | <i>Methylosinus</i> sp. LW3                   | WP_024881649  |
| pNK6a          | 74647          | 75834        | -1        | 395         | <i>repA</i> | 91         | 0         | 393            | chromosome partitioning protein ParA       | <i>Methylocystaceae</i>                       | WP_024881650  |
| pNK6a          | 178827         | 179813       | -1        | 328         | <i>parB</i> | 92         | 0         | 333            | chromosome partitioning protein ParB       | <i>Bradyrhizobium japonicum</i>               | WP_028133144  |
| pNK6a          | 179803         | 180567       | -1        | 254         | <i>parA</i> | 97         | 1.48E-178 | 254            | chromosome partitioning protein ParA       | <i>Bradyrhizobium japonicum</i>               | WP_028133143  |
| pNK6b          | 45368          | 46498        | -1        | 376         | <i>repC</i> | 99         | 0         | 410            | replication initiation protein RepC        | <i>Bradyrhizobium japonicum</i>               | WP_028153806  |
| pNK6b          | 46815          | 47834        | -1        | 339         | <i>repB</i> | 100        | 0         | 339            | plasmid partitioning protein               | <i>Bradyrhizobium japonicum</i>               | WP_028153807  |
| pNK6b          | 47837          | 49057        | -1        | 406         | <i>repA</i> | 100        | 0         | 394            | chromosome partitioning protein ParA       | <i>Bradyrhizobium japonicum</i>               | WP_028153808  |
| pNK6b          | 181819         | 182709       | -1        | 296         | <i>repC</i> | 82         | 5.42E-138 | 410            | replication initiation protein RepC        | <i>Bradyrhizobium</i> sp. OHSU_III            | WP_024584971  |
| pNK6b          | 182935         | 183948       | -1        | 337         | <i>repB</i> | 65         | 3.87E-60  | 332            | replication protein B                      | <i>Bradyrhizobium</i> sp. OHSU_III            | WP_029880243  |
| pNK6b          | 183945         | 185138       | -1        | 397         | <i>repA</i> | 100        | 0         | 397            | chromosome partitioning protein ParA       | <i>Bradyrhizobium japonicum</i>               | WP_028152592  |
| pNK6c          | 115359         | 116573       | 1         | 404         | <i>repA</i> | 100        | 0         | 404            | chromosome partitioning protein ParA       | <i>Bradyrhizobium japonicum</i>               | WP_028152782  |
| pNK6c          | 116570         | 117589       | 1         | 339         | <i>repB</i> | 100        | 0         | 339            | chromosome partitioning protein ParB       | <i>Bradyrhizobium japonicum</i>               | WP_028152783  |
| pNK6c          | 117786         | 119018       | 1         | 410         | <i>repC</i> | 99         | 0         | 410            | replication initiation protein RepC        | <i>Bradyrhizobium japonicum</i>               | WP_028152784  |
| pNK6c          | 130199         | 130960       | 1         | 253         | <i>parA</i> | 100        | 0         | 253            | chromosome partitioning protein ParA       | <i>Bradyrhizobium japonicum</i>               | WP_028152789  |
| pNK6c          | 130950         | 131930       | 1         | 326         | <i>parB</i> | 100        | 0         | 326            | chromosome partitioning protein ParB       | <i>Bradyrhizobium japonicum</i>               | WP_028152790  |
| pNK6d          | 13470          | 14345        | -1        | 291         | <i>repC</i> | 91         | 1.33E-133 | 441            | replication initiation protein RepC        | <i>Bradyrhizobium japonicum</i>               | WP_028181486  |
| pNK6d          | 14678          | 15706        | -1        | 342         | <i>repB</i> | 99         | 0         | 342            | replication protein B                      | <i>Bradyrhizobium japonicum</i>               | WP_028153002  |
| pNK6d          | 15703          | 16773        | -1        | 356         | <i>repA</i> | 100        | 0         | 404            | chromosome partitioning protein ParA       | <i>Bradyrhizobium japonicum</i>               | WP_028153001  |
| pNK6d          | 43476          | 45155        | -1        | 559         | <i>parB</i> | 100        | 0         | 559            | plasmid partitioning protein               | <i>Bradyrhizobium japonicum</i>               | WP_028152389  |

Table S6. Copy numbers of insertion sequences (ISs) in the genomes of NK6, USDA6, and USDA110 strains.

| IS                 |          |                       |        |        | HRS strain NK6          |      |       |         |       |       |       |               | non-HRS strain <sup>d</sup> |         |       |
|--------------------|----------|-----------------------|--------|--------|-------------------------|------|-------|---------|-------|-------|-------|---------------|-----------------------------|---------|-------|
|                    |          |                       |        |        | Chromosome <sup>b</sup> |      |       | Plasmid |       |       |       |               | NK6 mapping <sup>c</sup>    | USDA110 | USDA6 |
| Name in this study | ISFinder | Synonyms <sup>a</sup> | Family | Group  | V1+V2 region            | Core | Total | pNK6a   | pNK6b | pNK6c | pNK6d | Plasmid total |                             |         |       |
| ISRj1              | ISRj1    | RS $\alpha$           | IS630  | -      | 38                      | 76   | 114   | 8       | 1     | 1     | 1     | 11            | 203                         | 15      | 9     |
| ISRj2              | ISRj2    | RS $\beta$            | IS3    | IS150  | 8                       | 8    | 16    | 1       | 1     | 0     | 0     | 2             | 54                          | 12      | 7     |
| ISFK1              | ISFK1    | FK1                   | IS21   | -      | 7                       | 0    | 7     | 3       | 4     | 0     | 2     | 9             | 7                           | 6       | 5     |
| IS1632             | IS1632   | IS1632                | IS256  | -      | 6                       | 0    | 6     | 1       | 1     | 0     | 1     | 3             | 13                          | 2       | 2     |
| ISBj6_B            | ISBj6_B  | ISB20                 | IS701  | -      | 3                       | 0    | 3     | 2       | 0     | 0     | 0     | 2             | 4                           | 3       | 2     |
| ISB27              |          | ISB27                 | IS66   |        | 27                      | 22   | 49    | 8       | 17    | 5     | 3     | 33            | 64                          | 3       | 3     |
| ISBj2              | ISBj2    | ISBj2                 | IS5    | IS427  | 14                      | 8    | 22    | 2       | 0     | 0     | 2     | 4             | 27                          | 10      | 10    |
| ISBj3              | ISBj3    | ISBj3                 | IS3    | IS150  | 0                       | 0    | 0     | 0       | 0     | 0     | 0     | 0             | 1                           | 4       | 1     |
| ISBj4              | ISBj4    | ISBj4                 | IS110  | IS1111 | 1                       | 2    | 3     | 0       | 0     | 0     | 0     | 0             | 6                           | 6       | 1     |
| ISBj5              | ISBj5    | ISBj5                 | IS630  | -      | 0                       | 0    | 0     | 0       | 0     | 0     | 0     | 0             | 9                           | 5       | 5     |
| ISBj6              |          | ISBj6                 | IS110  | IS1111 | 0                       | 0    | 0     | 0       | 0     | 0     | 0     | 0             | 0                           | 1       | 0     |
| ISBj7              | ISBj7    | ISBj7                 | IS6    | -      | 4                       | 0    | 4     | 1       | 0     | 0     | 1     | 2             | 17                          | 11      | 10    |
| ISBj8              | ISBdi2   | ISBj8                 | IS1380 |        | 27                      | 25   | 52    | 5       | 3     | 2     | 2     | 12            | 90                          | 4       | 5     |
| ISBj9              | ISBj9    | ISBj9                 | IS701  | -      | 0                       | 0    | 0     | 0       | 0     | 0     | 0     | 0             | 0                           | 2       | 0     |
| ISBj10             |          | ISBj10                | IS21   |        | 0                       | 0    | 0     | 0       | 0     | 0     | 0     | 0             | 0                           | 1       | 2     |
| ISBj11             | ISBj11   | ISBj11                | IS21   | -      | 0                       | 0    | 0     | 0       | 0     | 0     | 0     | 0             | 0                           | 5       | 1     |
| ISBj12             | ISBj12   | ISBj12                | ISNCY  | ISLbi1 | 0                       | 0    | 0     | 2       | 0     | 0     | 2     | 4             | 0                           | 1       | 2     |
| ISBj7_B            | ISBj7_B  | ISBj13                | IS66   | -      | 0                       | 0    | 0     | 2       | 0     | 0     | 2     | 4             | 0                           | 3       | 1     |
| ISBj5_B            | ISBj5_B  | ISBj14                | IS5    | IS5    | 0                       | 0    | 0     | 2       | 0     | 0     | 2     | 4             | 1                           | 7       | 1     |
| ISBj2_B            | ISBj2_B  | ISBj15                | IS5    | IS5    | 2                       | 1    | 3     | 2       | 0     | 0     | 2     | 4             | 5                           | 3       | 2     |
| IS1631             | IS1631   |                       | IS21   | -      | 11                      | 16   | 27    | 2       | 0     | 0     | 2     | 4             | 34                          | 0       | 0     |
| Total              |          |                       |        |        | 148                     | 158  | 306   | 41      | 27    | 8     | 22    | 98            | 535                         | 104     | 69    |

<sup>a</sup> Synonyms used in genome paper of *B. diazoefficiens* USDA110 (5).

<sup>b</sup> IS copy numbers were counted separately within and outside the variable regions V1 and V2 of NK6 chromosome.

<sup>c</sup> IS copy number was estimated by mapping MiSeq sequences of NK6 (Table 3).

<sup>d</sup> IS copy numbers are shown according to refs (5) for USDA110 and (8) for USDA6.

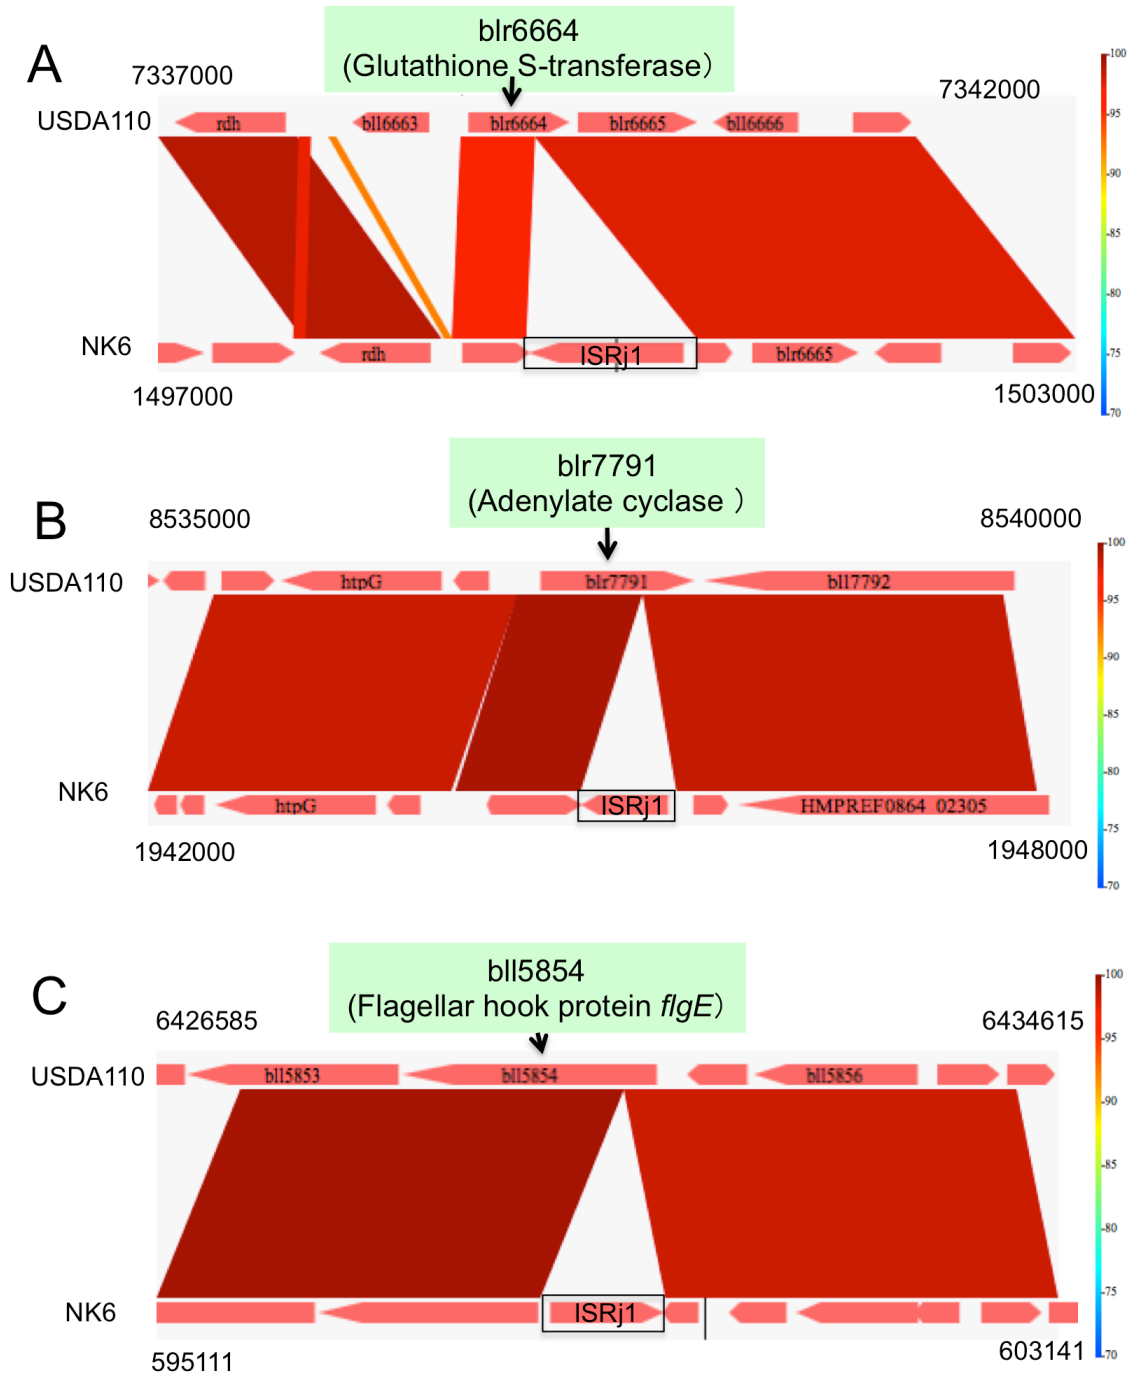

Fig. S1. Gene disruption by ISRj1 insertion in the chromosome of the HRS strain NK6. The disrupted genes, *blr6664* (A), *blr7791* (B), and *bli5854* (C), are important for survival or environmental responses.

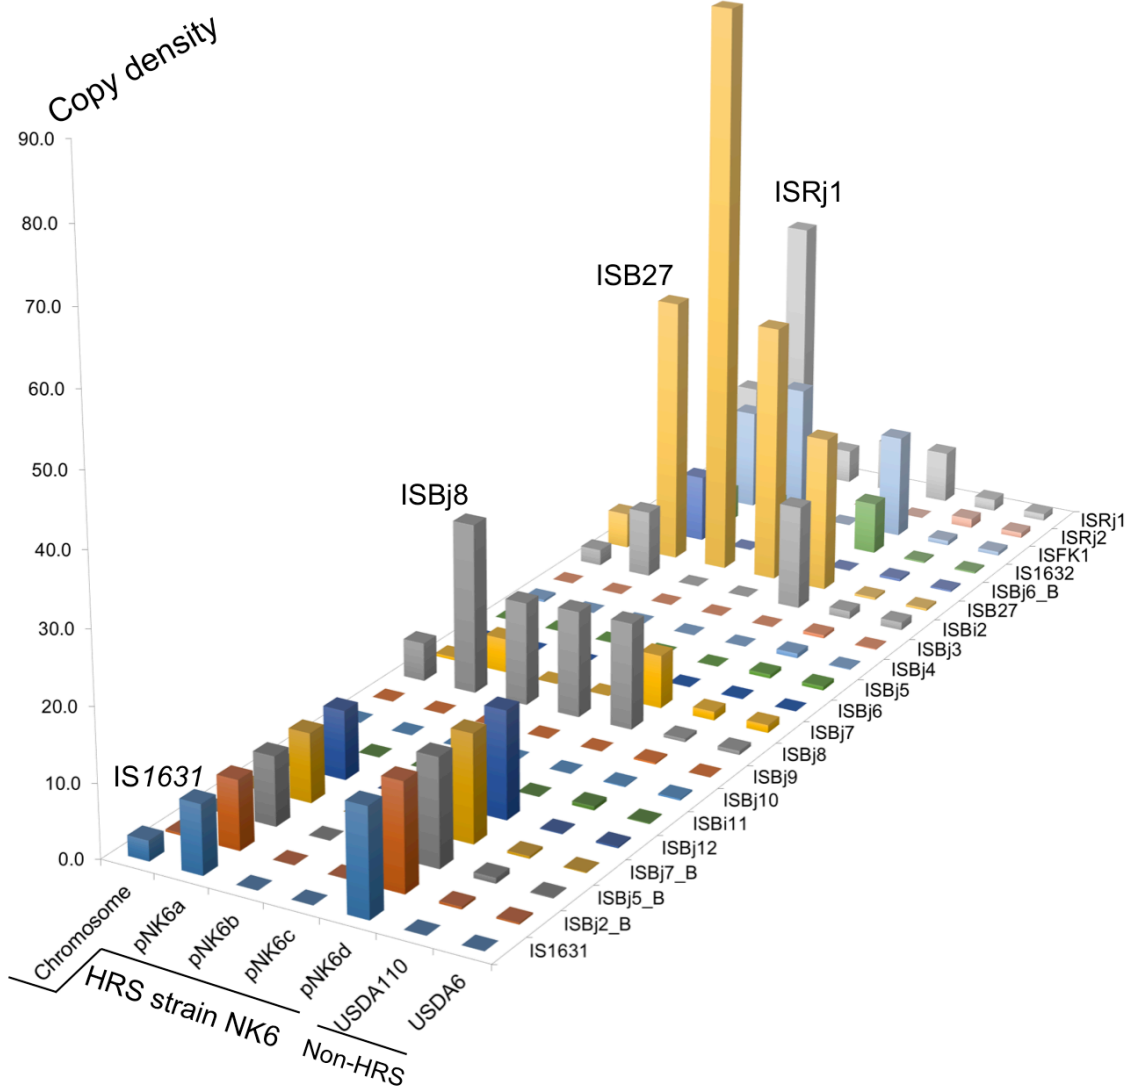

Fig. S2. Density of 21 insertion sequences (ISs) in the genomes of NK6, USDA110, and USDA6. The IS density is expressed as the copy number–based length (Mb). Note that plasmids pNK6a and pNK6d had higher density of ISs, including *IS1631*.



## References

1. **Isawa T, Sameshima R, Mitsui H, Minamisawa K.** 1999. IS1631 occurrence in *Bradyrhizobium japonicum* highly reiterated sequence-possessing strains with high copy numbers of repeated sequences RS $\alpha$  and RS $\beta$ . *Appl. Environ. Microbiol.* **65**: 3493-3501.
2. **van Berkum P, Fuhrmann JJ.** 2000. Evolutionary relationships among the soybean bradyrhizobia reconstructed from 16S rRNA gene and internally transcribed spacer region sequence divergence. *Int J Syst Evol Microbiol.* **50**: 2165-72.
3. **Sameshima R, Isawa T, Sadowsky MJ, Hamada T, Kasai H, Shutsrirung A, Mitsui H, Minamisawa K.** 2003. Phylogeny and distribution of extra-slow-growing *Bradyrhizobium japonicum* harboring high copy numbers of RS $\alpha$ , RS $\beta$  and IS1631. *FEMS Microbiol. Ecol.* **44**: 191-202.
4. **Xu LM, Ge C, Cui Z, Li J, Fan H.** 1995. *Bradyrhizobium liaoningense* sp. nov., isolated from the root nodules of soybeans. *Int. J. Syst. Bacteriol.* **45**: 706-711.
5. **Kaneko T, Nakamura Y, Sato S, Minamisawa K, Uchiumi T, Sasamoto S, Watanabe A, Idesawa K, Iriguchi M, Kawashima K, Kohara M, Matsumoto M, Shimpo S, Tsuruoka H, Wada T, Yamada M, Tabata S.** 2002. Complete genomic sequence of nitrogen-fixing symbiotic bacterium *Bradyrhizobium japonicum* USDA110. *DNA Res.* **9**: 189-197.
6. **Shiina Y, Itakura M, Choi H, Saeki Y, Hayatsu M, Minamisawa K.** 2014. Correlation between soil type and N<sub>2</sub>O reductase genotype (*nosZ*) of indigenous soybean bradyrhizobia: *nosZ*-minus populations are dominant in Andosols. *Microbes Environ.* **29**: 420-426.
7. **Okubo T, Tsukui T, Maita H, Okamoto S, Oshima K, Fujisawa T, Saito A, Futamata H, Hattori R, Shimomura Y, Haruta S, Morimoto S, Wang Y, Sakai Y, Hattori M, Aizawa S, Nagashima KV, Masuda S, Hattori T, Yamashita A, Bao Z, Hayatsu M, Kajiya-Kanegae H, Yoshinaga I, Sakamoto K, Toyota K, Nakao M, Kohara M, Anda M, Niwa R, Jung-Hwan P, Sameshima-Saito R, Tokuda S, Yamamoto S, Yamamoto S, Yokoyama T, Akutsu T, Nakamura Y, Nakahira-Yanaka Y, Takada Hoshino Y, Hirakawa H, Mitsui H, Terasawa K, Itakura M, Sato S, Ikeda-Ohtsubo W, Sakakura N, Kaminuma E, Minamisawa K.** 2012. Complete genome sequence of *Bradyrhizobium* sp. S23321: insights into symbiosis evolution in soil oligotrophs. *Microbes Environ.* **27**: 306-315.
8. **Kaneko T, Maita H, Hirakawa H, Uchiike N, Minamisawa K, Watanabe A, Sato S.** 2011. Complete genome sequence of the soybean symbiont *Bradyrhizobium japonicum* strain USDA6<sup>T</sup>. *Genes* **2**:763-787.
